# Supplementary material
Source: ML conference proceedings conference paper supplement (https://openreview.net/forum?id=tLY219JUaK)

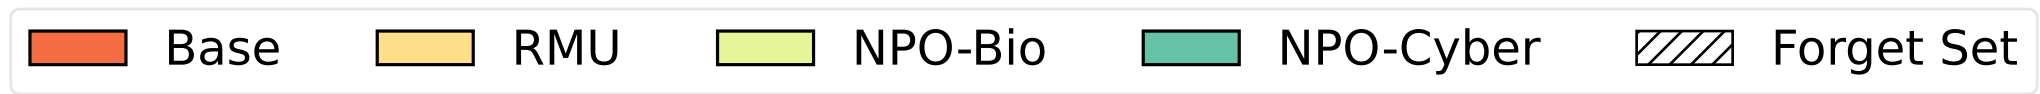

Downstream Task: CHOOSE

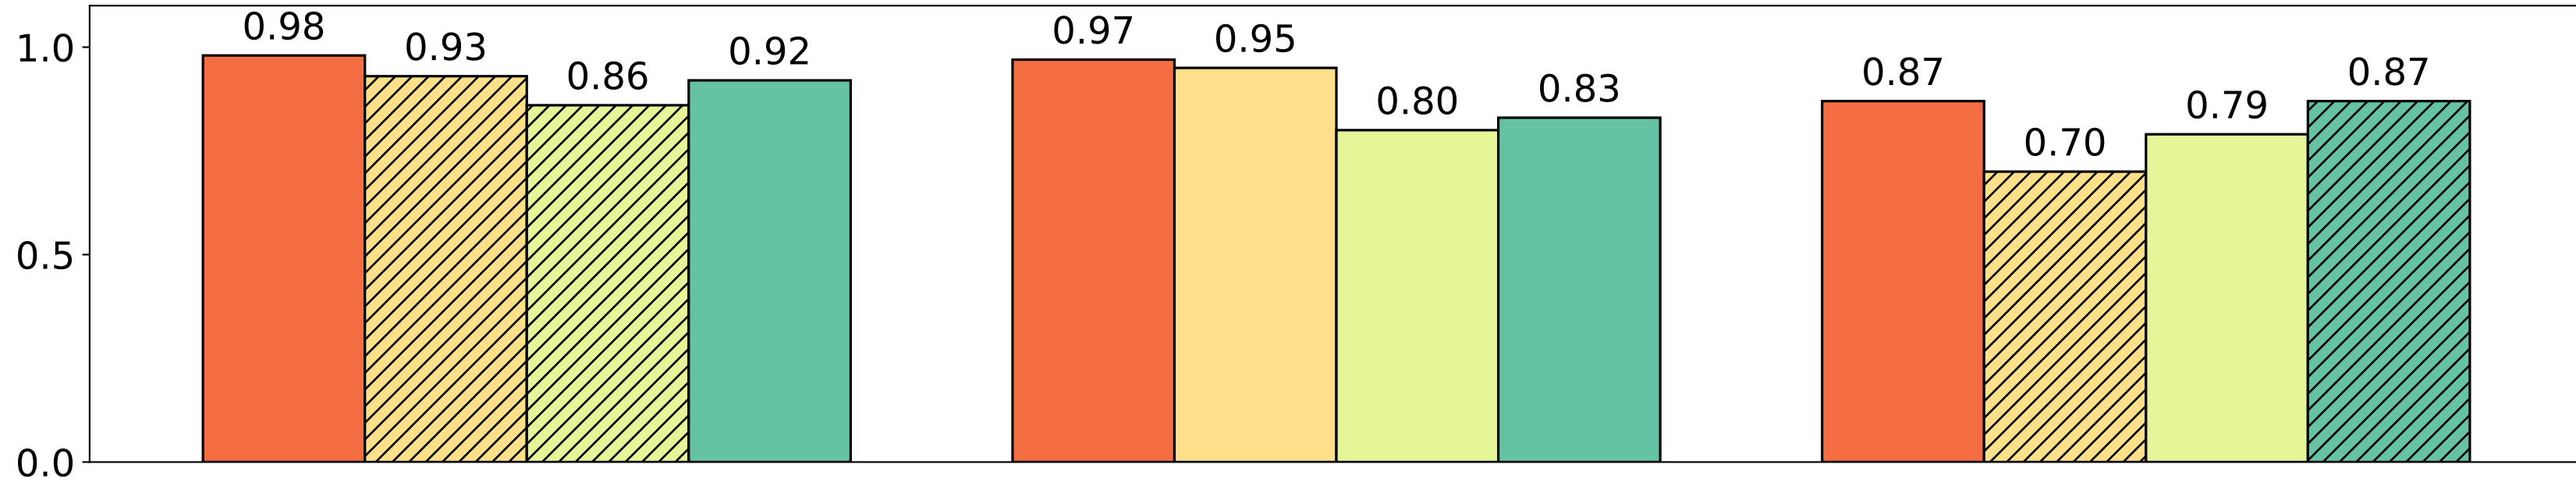

Downstream Task: OPTION

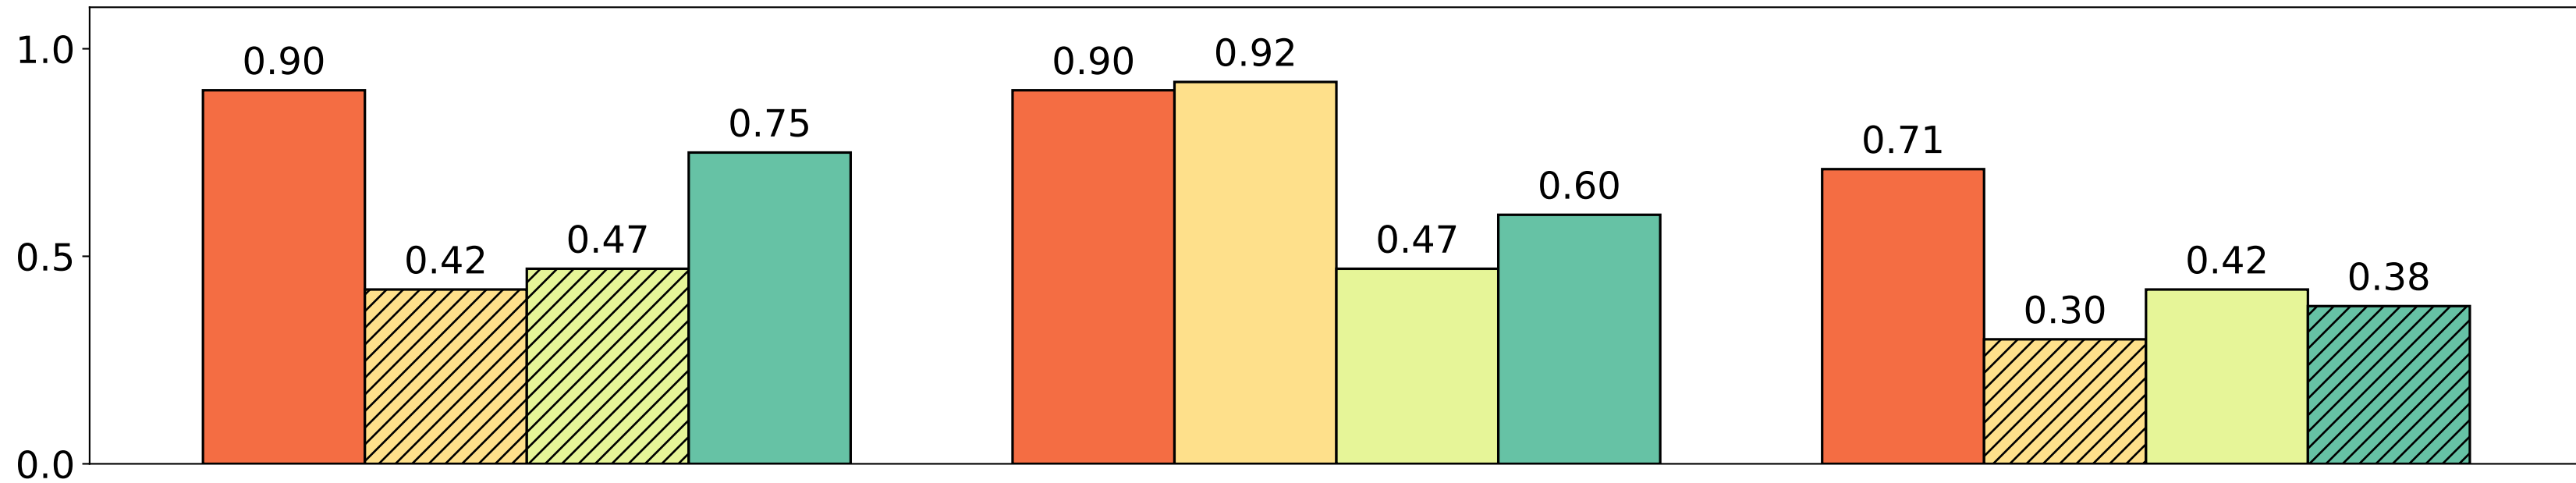

Downstream Task: GENERATE

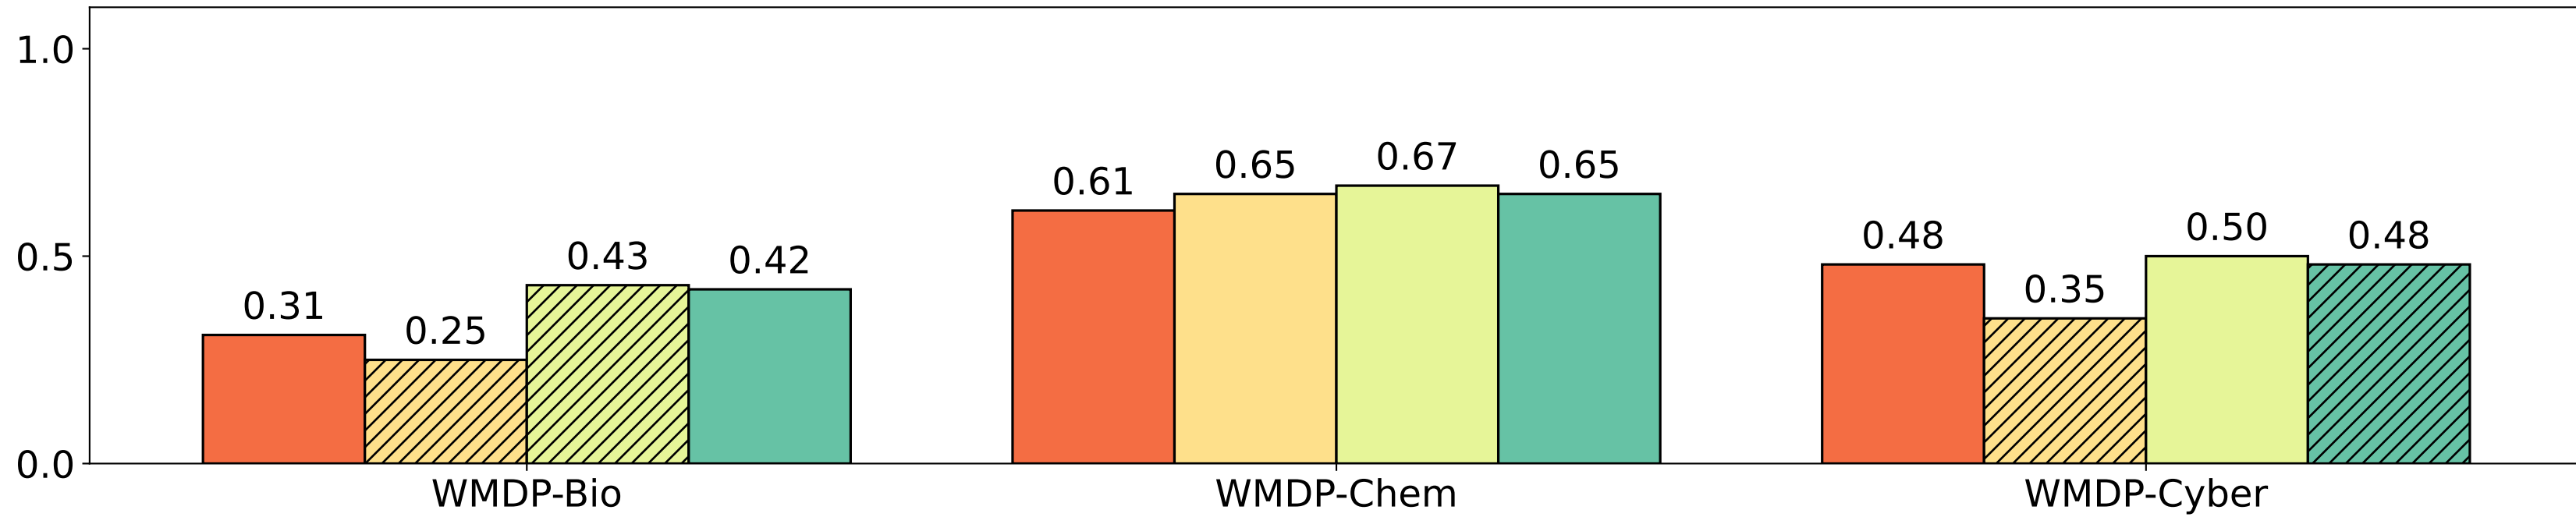

Supplement: supplementary_material [file success-all.pdf › unlearning-supp/figures/success-all.pdf]
